# Supplementary material for: Multilayer Technology of Decorated Plasters from the domus of Marcus Vipsanus Primigenius at Abellinum (Campania Region, Southern Italy): An Analytical Approach
Source: MDPI journal article supplement (doi:10.3390/min12121487), 2022-11-23
Supplement: s1 [file s1]

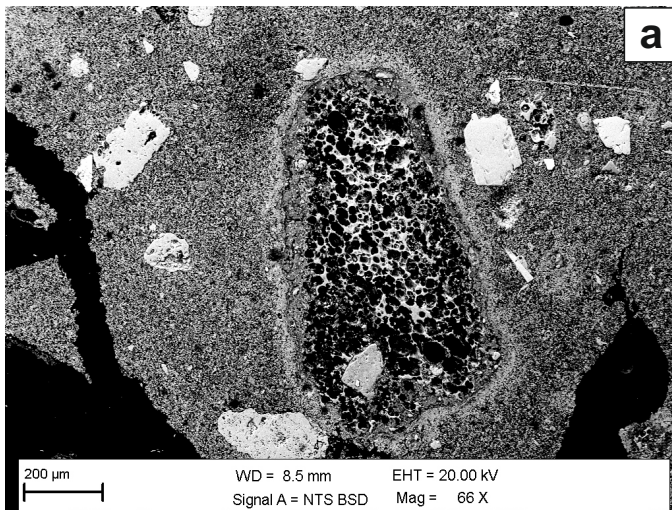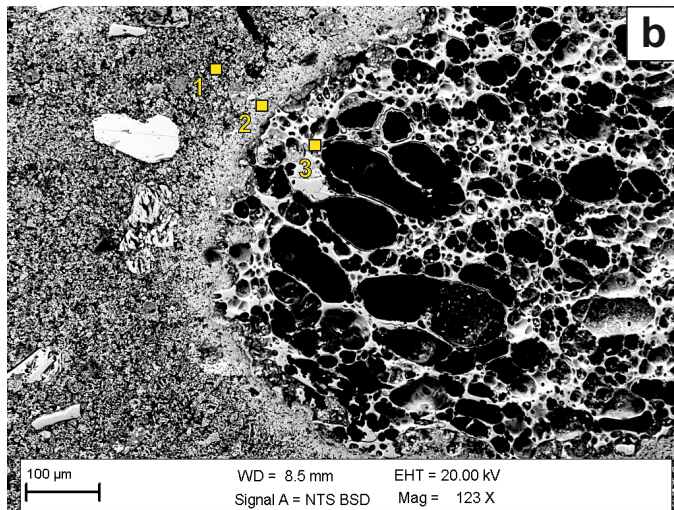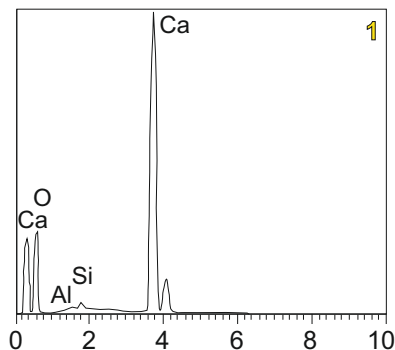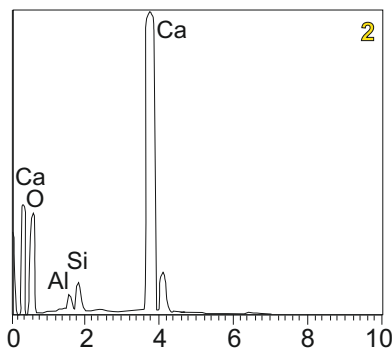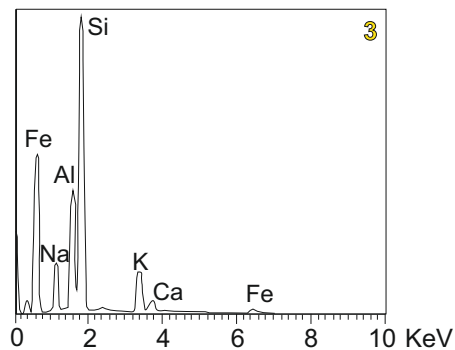

**Figure S1.** a) Reaction rim around a pumice in the sample AB6; b) detail of the reaction rim and EDS spectra of lime binder (spectrum 1), rim around the pumice (spectrum 2) and pumice (spectrum 3)
